# Supplementary material
Source: Springer Nature journal article supplement (https://www.springermedizin.de/resource/supplementary/12936_2012_2167_MOESM6_ESM.pdf/9542856)
Supplement: MOESM6 [file 9542856]

□ QT-NASBA

▨ RT-PCR

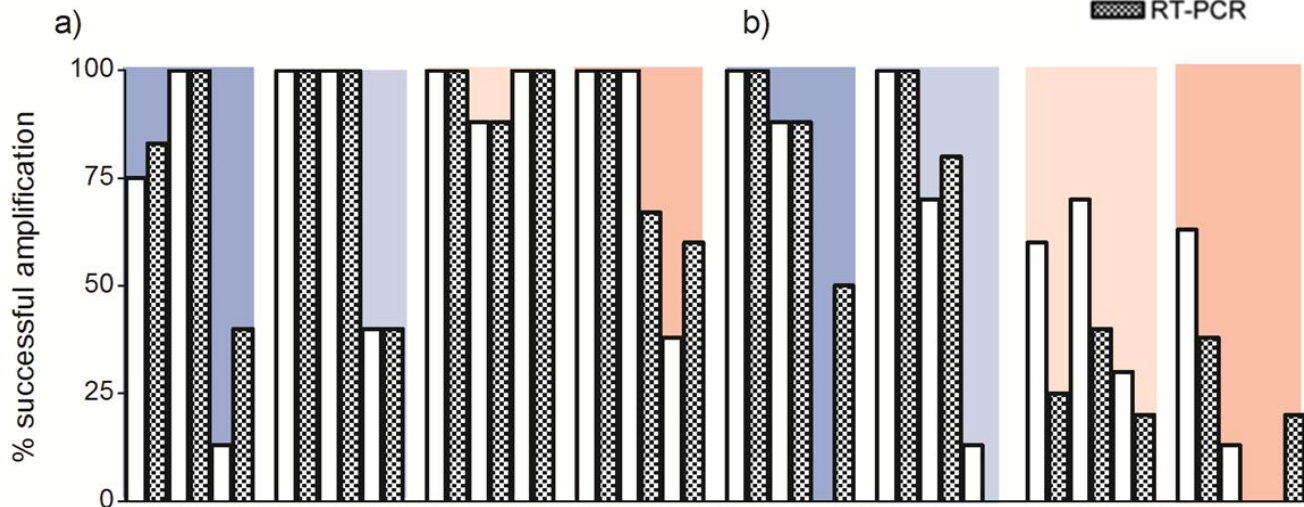

| gametocyte density/ $\mu$ l | 10    | 1 | 0.1 | 10    | 1 | 0.1 | 10   | 1 | 0.1 | 10    | 1 | 0.1 | 10    | 1 | 0.1 | 10    | 1 | 0.1 |      |  |  |       |  |  |
|-----------------------------|-------|---|-----|-------|---|-----|------|---|-----|-------|---|-----|-------|---|-----|-------|---|-----|------|--|--|-------|--|--|
| filter paper                | 903   |   |     | 903   |   |     | 903  |   |     | 903   |   |     | FTA   |   |     | FTA   |   |     | FTA  |  |  | FTA   |  |  |
| week 1 temperature          | 4°C   |   |     | 22°C  |   |     | 22°C |   |     | 22°C  |   |     | 4°C   |   |     | 22°C  |   |     | 22°C |  |  | 22°C  |  |  |
| subsequent temperature      | -20°C |   |     | -20°C |   |     | 22°C |   |     | -20°C |   |     | -20°C |   |     | -20°C |   |     | 22°C |  |  | -20°C |  |  |
| wet/dry                     | dry   |   |     | dry   |   |     | dry  |   |     | wet   |   |     | dry   |   |     | dry   |   |     | dry  |  |  | wet   |  |  |
